# Supplementary material for: An Early Th1 Response Is a Key Factor for a Favorable COVID-19 Evolution
Source: MDPI journal article supplement (doi:10.3390/biomedicines10020296), 2022-01-27
Supplement: s1 [file s1]

**Table S1.** Antigenic specificity of anti-SARS-CoV-2 depending on hospitalization requirements.

| Variables    | Non-hospitalized; N=53<br>Number (%) | Hospitalized; N=92<br>Number (%) | p-value |
|--------------|--------------------------------------|----------------------------------|---------|
| Serology     | 27 (51%)                             | 48 (52%)                         | 0.076   |
| S1 domain    | 20 (38%)                             | 37 (40%)                         | 0.73    |
| S2 domain    | 17 (32%)                             | 20 (22%)                         | 0.783   |
| RBD domain   | 23 (43%)                             | 39 (42%)                         | 0.949   |
| Ncap protein | 20 (38%)                             | 41 (45%)                         | 0.39    |

**Table S2.** Differential Th subsets between healthy controls and COVID-19 patients.

| Variables              | Healthy controls; N=29 |             | COVID-19 cohort; N=146 |            | p-value |
|------------------------|------------------------|-------------|------------------------|------------|---------|
|                        | Median                 | IQR         | Median                 | IQR        |         |
| %Th1                   | 6.4                    | 4.95-8.2    | 4.8                    | 3.3-6.5    | 0.01    |
| %Th2                   | 16.8                   | 11.37-20.9  | 13.85                  | 9.3-19.7   | 0.229   |
| %Th17                  | 6.95                   | 3.08-10.57  | 4                      | 3.1-5.7    | 0.018   |
| %Th1 early-activation  | 1.7                    | 0.7-2.1     | 0.3                    | 0.2-0.6    | < 0.001 |
| %Th2 early-activation  | 2.81                   | 1.32-3.6    | 0.4                    | 0.2-0.8    | < 0.001 |
| %Th17 early-activation | 1.2                    | 0.62-1.8    | 0.2                    | 0.1-0.4    | < 0.001 |
| %Th1 late-activation   | 1.48                   | 0.96-2.36   | 1.2                    | 0.6-2.46   | 0.254   |
| %Th2 late-activation   | 1.2                    | 1.45-1.89   | 0.3                    | 0.2-0.5    | < 0.001 |
| %Th17 late-activation  | 1.44                   | 0.57-2.1    | 0.2                    | 0.1-0.3    | < 0.001 |
| %Th1 senescence        | 4.27                   | 3.03-7.65   | 7                      | 4.85-9.785 | 0.008   |
| %Th2 senescence        | 11.5                   | 7.772-15.2  | 4.3                    | 2.1-7.65   | < 0.001 |
| %Th17 senescence       | 3.21                   | 1.55-7      | 2.1                    | 1.4-3.1    | 0.036   |
| %Th1 quiescence        | 9.76                   | 6.62-11.77  | 7.91                   | 5.9-10.1   | 0.097   |
| %Th2 quiescence        | 39.16                  | 27.22-42.55 | 41.4                   | 31.7-52.52 | 0.051   |
| %Th17 quiescence       | 14.35                  | 4.98-19.3   | 12.6                   | 8-15.5     | 0.941   |

Early-activation cells , ICOS+/PD-1-; late-activation cells, ICOS+/PD-1+; senescence, ICOS-/PD-1+;quiescence, ICOS-/PD-1-

**Table S3.** Differential immunological profile between asymptomatic COVID-19 patients and healthy controls.

| Variables              | Asymptomatic; N=12 |               | Healthy controls; N=29 |               | p-value |
|------------------------|--------------------|---------------|------------------------|---------------|---------|
|                        | Median             | IQR           | Median                 | IQR           |         |
| Lymphocytes            | 1500               | 1200 - 2050   | 1846                   | 1585 - 2129   | 0.121   |
| CD4 count              | 793.5              | 604 - 1307    | 783                    | 644 - 1099    | 0.908   |
| %CD4 Naïve             | 27.05              | 15.65 - 45    | 35                     | 29.32 - 43.65 | 0.202   |
| %CD4 CM                | 38.25              | 30.5 - 44.5   | 41                     | 30.22 - 46    | 0.528   |
| %CD4 EM                | 27.15              | 17.25 - 35.95 | 18.3                   | 13.57 - 24.87 | 0.108   |
| %CD4 TEMRA             | 2.3                | 0.85 - 4.56   | 0.7                    | 0.3 - 1.92    | 0.062   |
| %CD4 activation        | 6.25               | 2.95 - 8.8    | 4.1                    | 3.47 - 5.52   | 0.785   |
| %CD4 senescence        | 4.5                | 2.95 - 16.1   | 7.4                    | 4.85 - 12.9   | 0.406   |
| %CD4 double positive   | 0.6                | 0.3 - 3.65    | 0.8                    | 0.5 - 1.17    | 0.709   |
| CD8 count              | 504                | 383. - 7878   | 404                    | 285- 524      | 0.051   |
| %CD8 Naïve             | 11.95              | 3.8 - 24.55   | 27.6                   | 17.8 - 41.12  | 0.005   |
| %CD8 CM                | 5.85               | 3.25 - 7.6    | 13.7                   | 8.37 - 18.7   | <0.001  |
| %CD8 EM                | 47.7               | 37.2 - 62.05  | 42                     | 26.55 - 49.85 | 0.083   |
| %CD8 TEMRA             | 24.95              | 17.05 - 33.55 | 10                     | 7.52 - 24.5   | 0.03    |
| %CD8 activation        | 16.45              | 8.75 - 22.2   | 9.5                    | 6.05- 12.6    | 0.083   |
| %CD8 senescence        | 45.6               | 21.1 - 63.05  | 26.2                   | 20 - 35.85    | 0.048   |
| %CD8 double positive   | 7.2                | 3.3 - 15.85   | 4.5                    | 2.4 - 8.32    | 0.169   |
| %Th1                   | 7.5                | 5.3 - 10.2000 | 6.7                    | 4.95 - 8.2    | 0.653   |
| %Th2                   | 15                 | 9.2 - 19.35   | 16.8                   | 11.37 - 20.9  | 0.454   |
| %Th17                  | 3.75               | 2.3 - 6.4     | 6.95                   | 3.08 - 10.57  | 0.092   |
| %Th1 early-activation  | 0.25               | 0.1 - 0.55    | 1.17                   | 0.7- 2.06     | < 0.001 |
| %Th2 early-activation  | 0.45               | 0.2 - 0.75    | 2.81                   | 1.35 - 3.6    | < 0.001 |
| %Th17 early-activation | 0.15               | 0.1 - 0.4     | 1.19                   | 0.62 - 1.79   | < 0.001 |
| %Th1 late-activation   | 0.65               | 0.5-1.95      | 1.48                   | 0.96 - 2.36   | 0.066   |
| %Th2 late-activation   | 0.3                | 0.2-0.35      | 1.49                   | 1.14 - 1.89   | < 0.001 |
| %Th17 late-activation  | 0.2                | 0.1-0.2       | 1.44                   | 0.57 - 2.1    | < 0.001 |
| %Th1 senescence        | 10.35              | 4.2-13.5      | 4.27                   | 3.03 - 7.65   | 0.002   |
| %Th2 senescence        | 3.2                | 1.95-5.9      | 11.5                   | 7.72- 15.20   | 0.002   |
| %Th17 senescence       | 1.65               | 1.25-2.25     | 3.21                   | 1.55 - 6.98   | 0.051   |
| %Th1 quiescence        | 9.85               | 5.95-11.95    | 9.76                   | 6.62 - 11.77  | 0.881   |
| %Th2 quiescence        | 9.85               | 7.6-14.2      | 14.35                  | 4.98 - 19.3   | 0.697   |
| %Th17 quiescence       | 35.35              | 14.8-48.15    | 35.9                   | 27.22 - 42.55 | 0.736   |

Naïve (CCR7+ (CD45RA+); CM, Central memory (CCR7+/CD45RA-), EM, Effector memory (CCR7-/CD45RA-); TEMRA (CCR7-/CD45RA+), Terminal differentiated T memory cells; activated T-cells, HLA-DR+; senescence; CD57+; double positive, HLA-DR+/CD57+; early-activation cells , ICOS+/PD-1-; late-activation cells, ICOS+/PD-1+; senescence, ICOS-/PD-1+;quiescence, ICOS-/PD-1-.

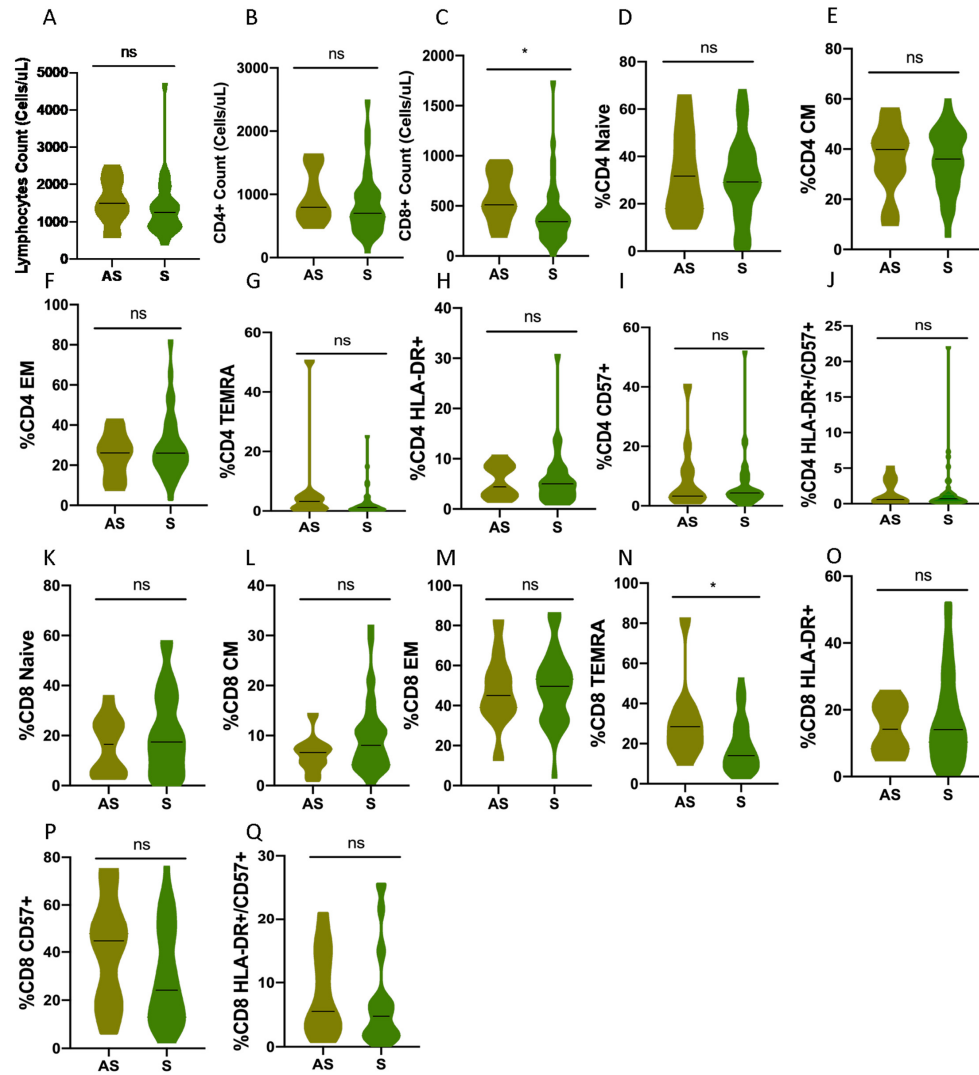

Figure S1. Lymphocytic phenotype in asymptomatic and symptomatic COVID-19 without hospitalization requirements. A) Lymphocyte count (cells/uL) B) Number of CD4+ (cells/uL) T cells C) Number of CD8+ (cells/uL) T cells D) Percentage of naive (CCR7+/CD45RA+) CD4+ T cells E) Percentage of CM (central memory, CCR7+/CD45RA-) CD4+ T cells F) Percentage of EM (effector memory, CCR7-/CD45RA-) CD4+ T cells G) Percentage of TEMRA (Terminal differentiated T memory cells ,CCR7-/CD45RA+) CD4+ T cells H) Percentage of activated (HLA-DR+) CD4+ T cells I) Percentage of senescent (CD57+) CD4+ T cells J) Percentage of double positive (HLA-DR+/CD57+) CD4+ T cells K) Percentage of naive (CCR7+/CD45RA+) CD8+ T cells L) Percentage of CM (central memory, CCR7+/CD45RA-) CD8+ T cells M) Percentage of EM (effector memory, CCR7-/CD45RA-) CD8+ T cells N) Percentage of TEMRA (Terminal differentiated T memory cells ,CCR7-/CD45RA+) CD8+ T cells O) Percentage of activated (HLA-DR+) CD8+ T cells P) Percentage of senescent (CD57+) CD8+ T cells Q) Percentage of double positive (HLA-DR+/CD57+) CD8+ T cells. AS; asymptomatic COVID-19 and S; symptomatic COVID-19 without hospitalization requirements. ns, not-significant; \* p 0.05.

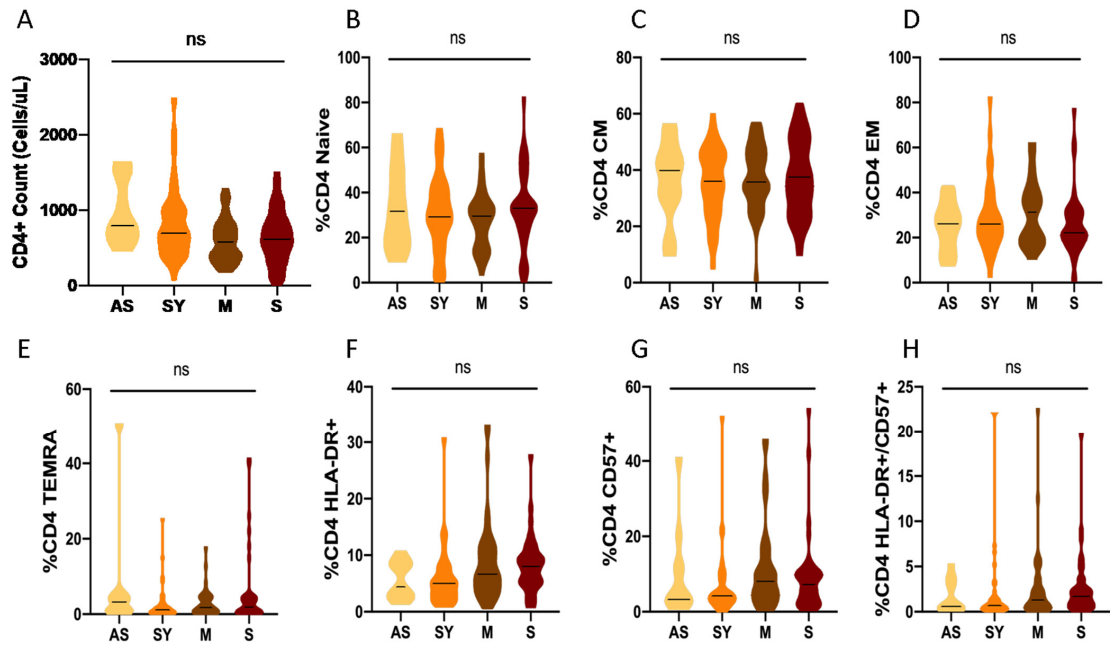

Figure S2. CD4+ subsets: comparison of asymptomatic COVID-19 patients according to disease severity. A) Number of CD4+ (cells/uL) T cells B) Percentage of naive (CCR7+/CD45RA+) CD4+ T cells C) Percentage of CM (central memory, CCR7+/CD45RA-) CD4+ T cells D) Percentage of EM (effector memory, CCR7-/CD45RA-) CD4+ T cells E) Percentage of TEMRA (Terminal differentiated T memory cells, CCR7-/CD45RA+) CD4+ T cells F) Percentage of activated (HLA-DR+) CD4+ T cells G) Percentage of senescent (CD57+) CD4+ T cells H) Percentage of double positive (HLA-DR+/CD57+) CD4+ T cells. AS; asymptomatic COVID-19 patients, SY; symptomatic COVID-19 patients without hospitalization requirements, M; mild to moderate hospitalized COVID-19 patients and S; Severe COVID-19 patients. ns, not-significant.

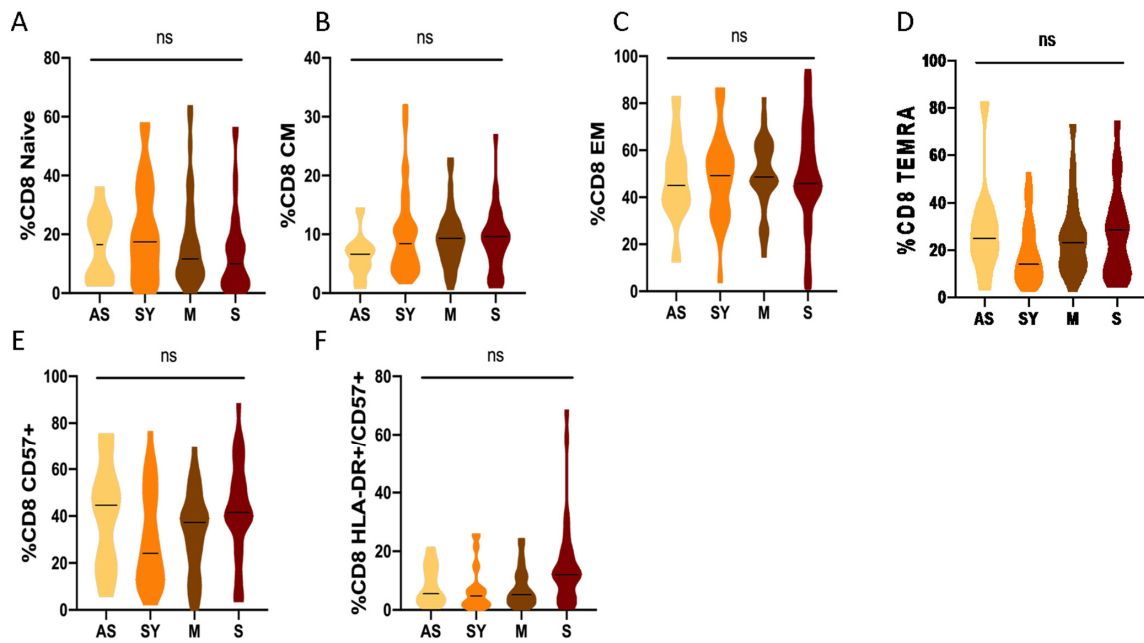

Figure S3. CD8+ subsets: comparison of asymptomatic COVID-19 patients vs. symptomatic ones. A) Percentage of naive (CCR7+/CD45RA+) CD8+ T cells B) Percentage of CM (central memory, CCR7+/CD45RA-) CD8+ T cells C) Percentage of EM (effector memory, CCR7-/CD45RA-) CD8+ T cells D) Percentage of TEMRA (Terminal differentiated T memory cells, CCR7-/CD45RA+) CD8+ T cells E) Percentage of senescent (CD57+) CD8+ T cells F) Percentage of double positive (HLA-DR+/CD57+) CD8+ T. AS; asymptomatic COVID-19 patients, SY; symptomatic COVID-19 patients without hospitalization requirements, M; mild to moderate hospitalized COVID-19 patients and S; Severe COVID-19 patients. ns, not-significant.
